# Supplementary material for: Mimicking liver sinusoidal structures and functions using a 3D-configured microfluidic chip
Source: Royal Society of Chemistry journal article supplement (doi:10.1039/c6lc01374k), 2017-01-01
Supplement: c6lc01374k1.pdf [file c6lc01374k1.pdf]

# Supplementary materials

## Mimicking Liver Sinusoidal Structures and Functions using a 3D-configured Microfluidic Chip

Yu Du, Ning Li, Hao Yang, Chunhua Luo, Yixin Gong, Chunfang Tong, Yuxin Gao,  
Shouqin Lü, and Mian Long

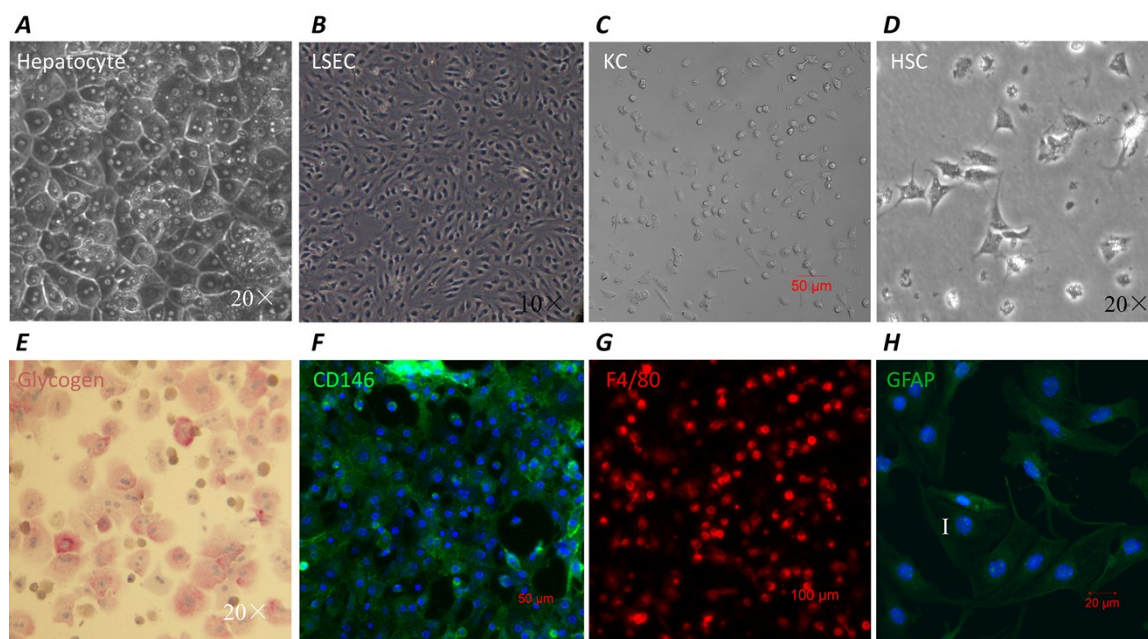

**Figure S1.** Characterization of four types of primary hepatic cells from mouse liver. Hepatocytes display a polygonal shape with double nucleus and clear edges (A) and almost all hepatocytes contain glycogen as stained in *purple* (E). LSECs form a monolayer presenting a cobblestone shape (B) and are identified with CD146 as stained in *green* (F). KCs yield a polymorphic shape (C) and are identified with F4/80 as stained in *red* (G). HSCs have a stellate-like shape (D) and are identified with GFAP as stained in *green* (H).

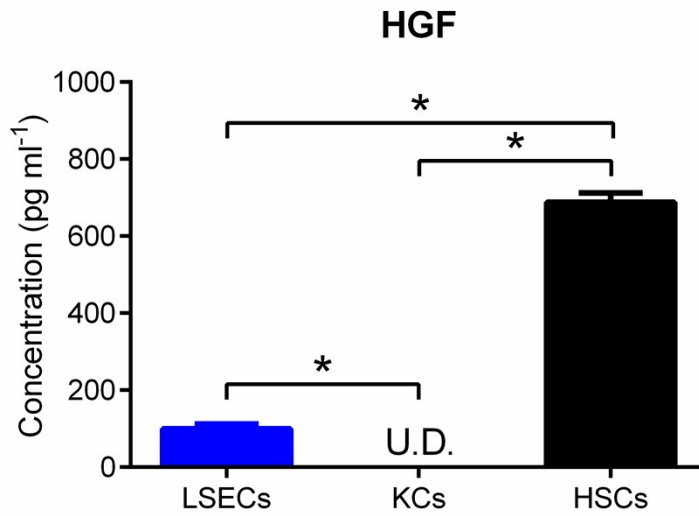

**Figure S2.** HGF secretion from each type of NPCs. HGF production ( $n = 4$ ) were determined from the supernatant collected at 24 h after each type of NPCs are soundly attached to substrate in 96-well plate. Plotted are the mean  $\pm$  SD and statistical analysis was conducted by  $t$ -test. \*:  $P < 0.05$ .

## **Materials and Methods**

### **Immunofluorescence staining and confocal microscopy**

Cells were fixed with 4% formaldehyde at room temperature for 15 min after 24 h co-culture *via* disassembling the chip. Blocked and incubated with respective primary mAbs at 4°C overnight in PBS containing 1% BSA, the cells were incubated for 2 h at 37°C with secondary antibodies in the same buffer. Specific immunostaining was performed with FITC-conjugated anti-CD146 mAbs for LSECs, PE-conjugated anti-F4/80 mAbs for KCs, rabbit polyclonal anti-GFAP antibodies (Abcam, UK) for HSCs, and Alex Fluor 647-conjugated anti-CK-pan mAbs (Biolegend, CA) and rabbit anti-E-cadherin mAbs (Cell Signaling Technology, MA) for HCs, followed by FITC-conjugated donkey anti-rabbit secondary antibodies (Abcam, UK) for those stained with non-conjugated primary mAbs. In some cases, HSCs residing in the chip were stained with a highly bright dye of Cell Tracker Green (Thermo Fisher, MA) to enhance the test sensitivity. Immunofluorescence images of stained cells were examined using confocal laser-scanning microscopy (Zeiss LSM710, Germany).

### **ELISA assay**

Culture medium was exchanged after all the four types of cells were attached well and spread completely onto the respective substrates at ~6 h. Collected supernatants after 24 h co-culture from the chip or from 96-well plate were centrifuged at 500×g, 4°C for 8 min to remove cell debris, and then stored at -80°C. ALB, hepatic growth (HGF), and

vascular endothelial growth factor (VEGF) concentrations were tested by ELISA assay kits for mouse ALB (Bethyl Laboratory, TX), HGF (R&D, MN), and VEGF (R&D, MN) in the respective sensitivity of  $< 1.23 \text{ ng ml}^{-1}$ ,  $1.33 \text{ pg ml}^{-1}$  and  $3 \text{ pg ml}^{-1}$ . Urea concentration was quantified by commercial urea assay kit (Stanbio Laboratory, TX).

### **Cytochrome P450 (CYP) activity assay**

For determining CYP metabolism activities, distinct cells were cultured inside the chip in culture medium supplemented with  $200 \text{ }\mu\text{M}$  phenacetin (for 1A2 metabolic test) or  $30 \text{ }\mu\text{M}$  dextromethorphan (for 2D6 test). Those supernatants were collected after 24 h co-culture and the metabolic products of phenacetin and dextromethorphan, *that is*, acetaminophen and dextroprhan, were respectively determined by LC-MS/MS (Agilent 1200 HPLC, CA and API 4000 mass-spectrometer, CA). Substrates and metabolized products used for calibrating curves were commercially purchased from RILD Company (Shanghai).

### **Scanning electron microscopy**

LSECs were seeded in the liver chip or a conventional dish at a density of  $1.3 \times 10^3 \text{ mm}^{-2}$  and cultured for 1 day. Cells were fixed with 2.5% (v/v) glutaraldehyde in PBS at  $4^\circ\text{C}$  overnight. The samples were then washed thrice with PBS for 10 min and dehydrated in ascending ethanol concentrations (30, 50, 70, 90 and 100%) for 10 min each. Subsequently, the samples were critical-point dried using liquid  $\text{CO}_2$  and sputter coated

with gold to avoid surface charging. Finally the specimens were investigated using a field emission (FE) SEM KYKY-EM8000F (KYKY Technology Co., Ltd, Beijing, China).

### **Statistical analysis**

*P* values were calculated using the two-tailed *t*-test for two groups with equal variance if passing the normality test (Shapiro-Will) or using Mann-Whitney test if not. For multiple group comparisons, one-way ANOVA test was performed if passing the normality test or using ANOVA on RANKs if not. Statistical significance was set at  $P < 0.05$ .
